# Supplementary material
Source: MDPI journal article supplement (https://www.mdpi.com/2077-0472/14/2/257)
Supplement: s1 [file s1]

Archive with 2 entries (2 files):
- Supplementary Figures.pdf
- Supplementary tables S1-S11.xlsx
