# Supplementary material
Source: MDPI journal article supplement (https://www.mdpi.com/2077-0472/14/2/257)
Supplement: s1 [file s1 › Supplementary tables S1-S11.xlsx]

## Sheet: Suppl. Table S1
Supplementary Table S1. Passport data of Buffelgrass accessions used in the study
Accessions	doi	Country of Origin	Region	latitude	longitude	elevation	Collection site
715
777	10.18730/G6P34	TZA	Africa	-9.875	35.341	980	149.2 km from Njambe towards Songea 104 km before Songea disturbed area.
894	10.18730/G7KEJ	TZA	Africa	-3.1946	35.4875	1970	14.4 km from Ngorongoro crater wild life lodge towards the crater along the entrance road steep escarpment.
914	10.18730/G7P3X	TZA	Africa	-2.1916	34.2343	1251	73 km from Soronera towards Tarime 19.7 km from Gurumeti river.
2043	10.18730/FZ78M	ETH	Africa	8.35	39.3333	1670	51 km from Asela towardss Addis Ababa.
2120	10.18730/G01MD	ETH	Africa	4.5333	38.25	1600	Dambella Wacho ILCA camp site for rangelands
2122	10.18730/G02A=	ETH	Africa	4.5333	38.25	1600	Dambella Wacho ILCA camp site for rangelands
2125	10.18730/G03BZ	ETH	Africa	4.5333	38.25	1600	Dambella Wacho on the western side of the camp site on the ridge
2136	10.18730/G0755	ETH	Africa	4.1333	38.2	1500	Medecho crater about 4 km off the main Dubluk-Mega road
2150	10.18730/G0C1D	ETH	Africa	4.5333	38.2667	1600	1 km from Dambella Wacho on the way to Yabelo town on the Sordu ranch.
6612	10.18730/G5WC*	UGA	Africa
6637	10.18730/G5WYD	ZWE	Africa	-18.0829	30.4496		Selous, I.C.A. on Termite mound
6640	10.18730/G5X1G	TZA	Africa	-4.8822	38.2818		Tanganyika, Mombo, on aerodrome
6642	10.18730/G5X2H	TZA	Africa				Lake Manyara
6644	10.18730/G5X3J	TZA	Africa	-6.1984	36.4171		Kongwa Research Station
6645	10.18730/G5X4K	KEN	Africa
6646	10.18730/G5X5M	TZA	Africa	-6.3488	36.4837		Dodoma; Mpwapwa
6647	10.18730/G5X6N	ZWE	Africa	-20.2	32.6	1100	Chipinge area
6649	10.18730/G5X7P	KEN	Africa
6652	10.18730/G5X9R	KEN	Africa	3	35.6659	500
7143	10.18730/G67TW	ZAF	Africa			800	along Molopo river
7146	10.18730/G67XZ
8306	10.18730/G74QW	ETH	Africa	8.2667	38.9	1570	114 km from Addis Ababa towards Shashemene. 6.6 km after Alem Tena.
9162	10.18730/G7PK8	ETH	Africa	7.2833	38.0833	1750	Near the town of Alaba Kolito, Wonja area protected site for soil conservation program.
9759	10.18730/G81X0	ETH	Africa	4.6333	38.2333	1680	595.5 km from Addis Ababa towards Moyale 33.3 km from Yabelo
12769	10.18730/FRMPG	KEN	Africa	-3.85	39.8	23	20.8 km from Mombasa towards Malindi 14.3 km from Shimolatewa bridge
12771	10.18730/FRMSK	KEN	Africa	-3.75	39.8167	5	31.8 km from Mombasa towards Malindi 25.3 km from Shimolatewa bridge
12787	10.18730/FRN7~	KEN	Africa	-3.8299	39.8019	100	89 km before Malindi on the Mombasa-Malindi road on rough road on the left side of the tarmac road past a river.
12884	10.18730/FRR7J	KEN	Africa	-3.5333	39.8333	40	10 km from Kilifi towards Sokoke villages on the junction of three roads
13121	10.18730/FRX8Z	KEN	Africa	1.5	35.4167	1300	515.5 km from Nairobi towards Lodwar via Kitale 17.5 km from river Morun bridge and 8.4 km from Ortum
13284	10.18730/FS158	KEN	Africa	-2.2333	37.7167	945	518 km from Mombasa Kiboko hunters lodge around the fence of the vegetable garden across the reservoir
13288	10.18730/FS19C	KEN	Africa	-2.55	38.0667	820	597 km from Nairobi towards Mombasa 59 km from Kiboko hunters lodge 19 km before Mtito Andei
13290	10.18730/FS1BE	KEN	Africa	-2.8	38.2833	670	613 km from Nairobi towards Mombasa 95 km from Kiboko hunters lodge 17 km from Mtito Andei
13292	10.18730/FS1DG	KEN	Africa	-2.92	38.4	600	9.6 km before Safari Lodge and a bridge 57.6 km before Voi
13299	10.18730/FS1KP	KEN	Africa	-3.768	39.229	410	31.5 km before Mariakani on the Nairobi-Mombasa road side
13404	10.18730/FS44X	ETH	Africa	8.6167	39.1	1760	2 km N of Mojo towards Addis Ababa
13406	10.18730/FS46Z	ETH	Africa	6.2667	39.8	1260	12 km SW of Mena towards Melkanara
13407	10.18730/FS47*	ETH	Africa	6.2667	39.8	1260	12 km SW of Mena towards Melkanara
13461	10.18730/FS5K2	ETH	Africa	5.3	38.2833	1650	33 km S of Agere Maryam towards Yabelo
13551	10.18730/FS87C	ETH	Africa	9.22	42.34	1620	2 km NW of Babile towards Harer
13559	10.18730/FS8FM	ETH	Africa	9.34	42.85	1750	6 km E of Jijiga on road towards Kebri Beyah
13562	10.18730/FS8HP	ETH	Africa	9.35	42.66	1740	16 km W of Jijiga towards Harer 1 km W of Hadew village
13563	10.18730/FS8JQ	ETH	Africa	9.2	42.63	1400	5 km S of Fafem village along Fafem river
15687	10.18730/FTXVT	MRT	Africa	18.05	-12.1667	280	17 km N of Foum Ajar towards Tidjikja
15688	10.18730/FTXWV	MRT	Africa	17.6667	-11.6667	360	30 km SW of El Khedia
16570	10.18730/FVMKE	NAM	Africa	-19.1	15.6333	1100	31 km West of Okakuejo, between Leeubron and Sprokieswoud.
16583	10.18730/FVN0V	NAM	Africa	-19.1333	16.0333	1100	12.1 km E of Okakuejo on road to Halali.
16598	10.18730/FVNF5	NAM	Africa	-19.2333	16.1	1100	20 km ESE of Okakuejo, on road to Olifantsbad.
16609	10.18730/FVNTG	NAM	Africa	-18.6333	15.5833	1100	On track from Charl Marais Dam in Etosha going N. to Ondangwa, 5 km N. of reserve fence, at Otjivalundu Saltpan.
16630	10.18730/FVPF0	NAM	Africa	-17.2167	12.2	200	in N Namib Desert. Cunene River at junction with Hartmann's Valley. Just downstream from DAS camp.
16656	10.18730/FVQ3M	NAM	Africa	-18	12.6	1000	NW Kaokoland on track between. Marienfluss and Orupembe in S. of Rooidrom.
16660	10.18730/FVQ7R	NAM	Africa	-17.7667	14.1667	1200	c5km S of Ombarundu checkpoint on cutline running NS between Owamboland and Kaokoland (c60km S of Ruacana).
16675	10.18730/FVQP2	NAM	Africa	-19.3167	14.45	1250	Hobatere Game Reserve on Tevrede Farm 11km E of lodge on rd towards main Kamanjab Ruacana rd.
16855	10.18730/FVX6Y	NER	Africa	16.1	4.7833	370	4 km S from Tillia
16868	10.18730/FVXK6	NER	Africa	15.9	11.2833	370	19 km S from Termit
18066	10.18730/FWX4G	BWA	Africa	-21.0833	26.7667	1100	68.2 km fm Francistown, along main rd to Orapa, going W.
18069	10.18730/FWX7K	BWA	Africa	-20.8833	25.7833	900	Makgadigadi. In Sua Pan, 10 km into Pan going N. Slightly elevated ridge on W side of Sua pan
18071	10.18730/FWX8M	BWA	Africa	-20.8333	25.3667	900	Makgadigadi Pans. Kubu Island in Sua Pan. 20 km into Pan fm W edge. Completely isolated rocky granite outcrop with trees.
18073	10.18730/FWXAP	BWA	Africa	-20.5833	25.8167	900	Makgadigadi Area. Along [rd] going N between Sua and Ntwetwe Pans. 82 km N of Mmatsumo. Not on pan itself.
18077	10.18730/FWXET	BWA	Africa	-20.1833	22.3667	900	Ngamiland. Rd fm Tsau to Aha Hills, going W. 6km from Tsau.
18094	10.18730/FWXX4	BWA	Africa	-24.5167	23.8833	1100	Southern Dist. Sekoma. Right on pan and its edges.
18108	10.18730/FWYAH	BWA	Africa	-26.5833	22.0667	900	Kgalagadi 48 km beyond where main road joins Molopo Valley. Between Kolongkwaneng and Bogogobo.
18123	10.18730/FWYNW	BWA	Africa	-26.7833	20.6333	800	Kgalagadi 12 km N of Bokspits following Nossob Valley towards Twee Rivieren.
19366	10.18730/FY4GJ	COD	Africa	-0.7667	29.3833	970	10KM.E RWINDI - VITSHUMBI, VIRUNGA NAT.PARK
19367	10.18730/FY4HK	BWA	Africa	-23.3667	21.1333	1050	112KM ESE NCOJANE
19368	10.18730/FY4JM	BWA	Africa	-22.7	20.15	1110	56.9KM S CHARLES HILL, TSHUKUDU PAN
19369	10.18730/FY4KN	BWA	Africa	-23.1	21.9	1050	5KM W MAITLOADMUDUMUDU PAN
19371	10.18730/FY4NQ	BWA	Africa	-24	23.75	1190	10.8KM W DUTLWE, EDGE OF KHUZE PAN
19372	10.18730/FY4PR	BWA	Africa	-26.6833	21.75	870	13KM S MIDDLEPITS, MOLOPO VALLEY
19379	10.18730/FY4XZ	UGA	Africa				MOROTO
19380	10.18730/FY4Y*
19382	10.18730/FY50$	ZWE	Africa
19387	10.18730/FY552	TZA	Africa	-3.6667	34	1117	LUBAGA
19388	10.18730/FY563	TZA	Africa	-3.6667	34	1117	LUBAGA
19389	10.18730/FY574	TZA	Africa	-3.6667	34	1117	LUBAGA
19390	10.18730/FY585	TZA	Africa	-3.6667	34	1117	LUBAGA
19392	10.18730/FY5A7	TZA	Africa	-3.0667	34	1302	LUBAGA
19394	10.18730/FY5C9	TZA	Africa	-3.0667	34	1302	LUBAGA
19395	10.18730/FY5DA	TZA	Africa	-3.8003	33.5321	1080	MWAMALA
19397	10.18730/FY5FC	TZA	Africa	-2.5833	33.4667	1140	MASWA (NYALIKUNGU)
19398	10.18730/FY5GD	TZA	Africa	-2.5833	33.4667	1140	MASWA (NYALIKUNGU)
19400	10.18730/FY5KG	TZA	Africa	-2.5833	33.4667	1140	MASWA (NYALIKUNGU)
19401	10.18730/FY5MH	TZA	Africa	-2.5833	33.4667	1140	MASWA (NYALIKUNGU)
19404	10.18730/FY5QM	TZA	Africa	-2.5833	33.4667	1140	MASWA
19405	10.18730/FY5RN	TZA	Africa	-2.5534	33.4857	1149	SOLA
19406	10.18730/FY5SP	TZA	Africa	-2.5534	33.4857	1149	SOLA
19409	10.18730/FY5WS	TZA	Africa	-1.9337	32.927	1144	LUBAGA
19411	10.18730/FY5YV	TZA	Africa	-3.6667	33.4167	1129	SHINYANGA TOWN
19412	10.18730/FY5ZW	TZA	Africa	-3.6667	33.4167	1129	SHINYANGA TOWN
19413	10.18730/FY60X	TZA	Africa	-3.8	32.6	1229	KAHAMA
19414	10.18730/FY61Y	TZA	Africa	-3.8	32.6	1229	KAHAMA
19417	10.18730/FY64~	TZA	Africa	-3.8	32.6	1229	KAHAMA
19418	10.18730/FY65$	TZA	Africa	-3.8	32.6	1229	KAHAMA
19420	10.18730/FY67U	TZA	Africa	-3.8	32.6	1229	KAHAMA
19421	10.18730/FY680	TZA	Africa	-3.8	32.6	1229	KAHAMA
19425	10.18730/FY6C4	TZA	Africa	-3.8	32.6	1229	KAHAMA
19431	10.18730/FY6JA	IND	Asia				SEED OBTAINED FROM COIMBATORE, MADRAS
19432	10.18730/FY6KB	UGA	Africa	-0.2	29.8833	1000	MWEYA ON N BANK OF KAZINGA CHANNEL
19439	10.18730/FY6TJ	KEN	Africa	-1.2833	36.8333	1667	NAIROBI
19440	10.18730/FY6VK	KEN	Africa	-4	39.7	15	MTWAPA VILLAGE AREA
19442	10.18730/FY6XN	ZWE	Africa	-21.0833	30.5	591	237KM.S FORT VICTORIA-BEITBRIDGE
19448	10.18730/FY73V	ZAF	Africa	-25.4667	30.9667	545	3KM.W NELSPRUIT ON N4
19450	10.18730/FY75X	ZAF	Africa	-24.9667	27.2667	909	24KM.S THABAZIMBI-RUSTENBURG
19451	10.18730/FY76Y	NAM	Africa	-20.8833	16.1833	1606	KALKFELD
19452	10.18730/FY77Z	NAM	Africa	-24.8333	16.8333	1121	24KM.S MARIENTAL - KEETMANSHOOP
19453	10.18730/FY78*	ZAF	Africa	-32.4167	24.2	848	24KM.E ABERDEEN ON N1
19454	10.18730/FY79~	ZWE	Africa	-18	30.3333	1243	EAST OF HARTLEY
19455	10.18730/FY7A$	NAM	Africa	-19	15.8667	1090	ETOSHA PAN SALT LAKE
19456	10.18730/FY7B=	ZAF	Africa
19457	10.18730/FY7CU	ZAF	Africa
19458	10.18730/FY7D0	ZAF	Africa
19459	10.18730/FY7E1	ZAF	Africa
19460	10.18730/FY7F2	ZAF	Africa
19461	10.18730/FY7G3	ZAF	Africa
19462	10.18730/FY7H4	ZAF	Africa
19464	10.18730/FY7K6	ZAF	Africa
19465	10.18730/FY7M7	SOM	Africa	0.3333	42.4167	20	20KM.S AFMADU
19467	10.18730/FY7P9	SOM	Africa	9.5167	44.0333	1374	NR HARGEISA
19470	10.18730/FY7SC	SOM	Africa	3.0333	43.05	396	250KM.NW MOGADISCIO
19472	10.18730/FY7VE	ZAF	Africa	-25.73	28.24		Rietondale Research Station, Pretoria; Plot A 201, ex Roedtan
19473	10.18730/FY7WF	ZAF	Africa	-24.1	31.89	370	KRUGER NAT PARK, Mativuhlungu River
19474	10.18730/FY7XG	ZAF	Africa	-24.0333	31	439	KRUGER NAT PARK,15KM.S OLIFANTS RIVER
19476	10.18730/FY7ZJ	ZAF	Africa	-22.9667	31.2833	314	KRUGER NAT PARK,30KM.N SHINGWIDZI RIVER
19479	10.18730/FY82N	ZAF	Africa	-23.12	29.64	900	Mara Agricultural Research Station, Mara
19480	10.18730/FY83P	ZAF	Africa	-23.12	29.64	900	Mara Agricultural Research Station, Mara

## Sheet: Supp.Table S2
Supplementary Table S2. Mean performance of the accessions for two growing seasons(2015 and 2016).
No.	Accesessions	YLD	PH	NDF	ADF	CP	TDN	DMI
1	715	6313.37	120.94	72.57	44.34	8.98	47.58	1.65
2	777	3167.18	90.72	70.98	42.67	10.92	49.98	1.69
3	894	7205.83	112.83	74.63	47.11	9.98	46.24	1.61
4	914	4766.9	96.83	73.17	45.5	9.13	46.86	1.65
5	2043	4906.01	121.56	74.68	47.21	8.55	45.29	1.61
6	2120	3497.01	100.17	73.35	45.71	10.05	47.28	1.64
7	2122	3808.02	105.83	72.75	44.78	11.04	48.55	1.65
8	2125	4445.45	112.17	72.63	45.01	10.23	47.89	1.65
9	2136	4088.38	99.89	73.33	45.45	9.88	47.35	1.64
10	2150	4297.73	101.11	73.29	45.45	9.12	46.88	1.64
11	6612	5309.66	103.28	71.7	44.5	9.45	47.76	1.67
12	6637	4489.7	101.78	72.82	44.41	9.8	48.05	1.65
13	6640	2982.02	113.67	71.48	43.87	9.49	48.23	1.68
14	6642	6633.93	125.28	73.32	46.68	9.64	46.33	1.64
15	6644	4377.63	104.33	74.77	46.43	9.67	46.53	1.61
16	6645	3210.95	74.17	70.18	42.48	10.32	49.74	1.71
17	6646	7794.4	118.11	72.32	46	9.1	46.48	1.66
18	6647	5391.15	114.08	71.56	43.89	8.62	47.68	1.68
19	6649	4066.46	99.22	72.31	44.42	8.35	47.14	1.66
20	6652	2876.38	85.67	71.68	43.72	11.16	49.38	1.68
21	7143	7287.38	114.67	72.73	45.43	9.06	46.86	1.65
22	7146	3504.12	95.74	71.54	43.7	11.07	49.33	1.68
23	8306	2533.79	100.22	70.89	43.6	10.66	49.16	1.69
24	9162	3927.07	108.58	72.32	44.5	10.55	48.45	1.66
25	9759	4547.04	105.94	73.19	45.3	9.34	47.13	1.64
26	12769	1609.65	89.92	70.43	40.4	11.15	51.73	1.71
27	12771	3242.41	108.61	70.72	42.68	10.97	50	1.7
28	12787	2772.85	104.28	73	46.11	8.56	46.07	1.64
29	12884	3224.82	84.33	70.66	42.12	11.84	50.93	1.7
30	13121	2248.1	87	73.6	45.02	9.96	47.71	1.63
31	13284	4409.64	92.83	71.01	41.4	10.72	50.75	1.69
32	13288	3615.57	95.39	72.95	45.08	10.03	47.71	1.65
33	13290	3294.7	92.22	72.51	44.83	10.69	48.3	1.66
34	13292	5294.08	115.39	72.9	44.46	9.62	47.9	1.65
35	13299	5125.94	109.89	74.23	47.24	9.83	46.06	1.62
36	13404	5425.21	116.17	73.48	45.61	9.21	46.82	1.64
37	13406	2889.13	103.22	70.98	42.39	12.17	50.95	1.69
38	13407	5035.92	102.61	72.24	43	11.15	49.88	1.66
39	13461	4445.36	135.22	75.68	48.69	7.54	43.61	1.59
40	13551	4075.47	94.92	71.69	43.29	11.42	49.84	1.68
41	13559	5220.31	93	72.05	44.28	11.16	48.98	1.67
42	13562	4731.14	91.25	71.1	41.93	11.42	50.81	1.69
43	13563	6432.21	106.33	71.28	43.77	9.79	48.49	1.68
44	15687	2763.68	81.89	72.34	44.08	10.82	48.91	1.66
45	15688	2306.66	75.61	71.04	42.16	10.63	50.16	1.69
46	16570	3827.3	90.78	70.89	42.86	11.41	50.15	1.7
47	16583	5429.5	113.66	71.58	44.23	11.3	49.11	1.68
48	16598	3489.71	92.16	70.28	42.71	11.46	50.29	1.71
49	16609	6988.67	133.99	75.52	48.26	9.36	45.04	1.59
50	16630	3518.48	107.22	71.86	43.49	9.02	48.21	1.67
51	16656	2732.89	85.83	72.67	44.53	9.5	47.77	1.65
52	16660	3235.17	97.22	72.96	44.98	10.29	47.94	1.65
53	16675	3858.58	93.17	72.85	43.48	11.21	49.58	1.65
54	16855	4715.43	104.22	72.72	46.26	9.56	46.58	1.65
55	16868	2752.53	120.25	70.51	42.3	10.88	50.21	1.71
56	18066	3361.56	78.33	72.48	43.76	9.86	48.54	1.66
57	18069	3724.11	102.28	71.88	43.75	11.19	49.38	1.67
58	18071	2970.77	93.44	70.62	43.83	10.13	48.66	1.7
59	18073	4434.98	97.94	72.07	43.99	10.95	49.05	1.67
60	18077	6723.74	114.44	73.21	45.52	9.91	47.32	1.64
61	18094	3822.52	87.28	70.23	41.53	11.73	51.28	1.71
62	18108	2909.21	88.25	72.15	43.69	11.3	49.48	1.66
63	18123	3518.11	98.75	72.05	43.95	11.06	49.16	1.67
64	19366	5689.52	113.89	73.06	45.57	8.83	46.62	1.64
65	19367	3626.97	82.89	69.98	41.25	10.6	50.78	1.72
66	19368	3363.13	102.33	72.15	44.22	9.96	48.28	1.67
67	19369	2724.97	96.67	72.46	43	12.21	50.54	1.66
68	19371	3162.45	71.5	71.37	42.74	10.44	49.62	1.68
69	19372	3393.47	100.94	72.95	45.46	10.38	47.66	1.65
70	19379	6494.11	110.81	73.3	44.65	9.32	47.58	1.64
71	19380	4947.95	97.33	72.75	44.36	10.59	48.57	1.65
72	19382	6046.56	113.75	71.45	45.11	8.08	46.48	1.68
73	19387	5909.74	125.33	71.58	45.12	9.51	47.36	1.68
74	19388	3720.84	102.17	70.74	42.47	9.87	49.47	1.7
75	19389	5592.32	105.33	72.2	44.5	9.4	47.73	1.66
76	19390	3364.07	93.56	71.26	42.68	11.12	50.09	1.69
77	19392	4692.52	110	73.31	45.54	10.47	47.66	1.64
78	19394	6643.22	111.56	72.63	44.64	9.3	47.57	1.65
79	19395	3758.65	97.17	71.17	42.38	11.08	50.28	1.69
80	19397	6063.18	105.72	73.14	45.36	9.66	47.29	1.64
81	19398	4703.71	106.78	72.59	45.33	9.69	47.33	1.65
82	19400	6022.19	106.72	72.92	44.98	8.8	47.02	1.65
83	19401	4761.03	106.39	74.11	47.07	9.42	45.92	1.62
84	19404	4992.29	101.67	73.07	44.77	9.86	47.82	1.64
85	19405	6781.67	107.06	72.14	45.33	10.05	47.55	1.66
86	19406	5821.47	119.89	74.09	46.97	9.28	45.91	1.62
87	19409	4317.89	100.11	72.35	44.75	10.12	48	1.66
88	19411	4780.57	113.94	72.93	45.11	10.35	47.89	1.65
89	19412	5068.99	94.22	71.74	44.76	11.3	48.73	1.68
90	19413	5787.77	111.19	72.28	45.55	9.69	47.16	1.66
91	19414	6942.72	129.67	72.51	45.71	8.93	46.58	1.66
92	19417	5708.3	109.72	74.15	46.33	9.44	46.45	1.62
93	19418	5285.84	115.33	74.82	48.13	9.18	45.02	1.61
94	19420	3581.65	102.92	70.12	42.2	11.23	50.51	1.71
95	19421	4144.71	100.17	71.6	43.46	11.5	49.77	1.68
96	19425	3773.39	89.06	70.19	42.67	11.96	50.62	1.71
97	19431	7437.1	118.06	73.9	46.87	8.82	45.69	1.63
98	19432	3320.21	105.33	73.08	44.85	10.06	47.9	1.65
99	19439	4219.78	101.75	74.43	45.75	6.11	44.81	1.61
100	19440	7247.97	123	73.36	46.79	8.53	45.57	1.64
101	19442	9097.54	126.44	74.97	48.53	7.9	43.94	1.6
102	19447	4074.35	87.5	72.29	43.93	10.89	49.06	1.66
103	19448	7123.35	113.67	74.4	48.38	6.37	43.1	1.61
104	19450	4527.26	100.39	71.54	43.3	10.9	49.51	1.68
105	19451	3115.74	102.33	72.3	45.71	10.85	47.77	1.66
106	19452	3562.08	98.61	72.71	45.9	10.93	47.69	1.65
107	19453	4834.83	94.11	71.47	44.43	11.16	48.87	1.68
108	19454	7370.61	118.67	71.86	45.65	9.62	47.05	1.67
109	19455	3433.62	91	71.08	45.51	9.55	47.11	1.69
110	19456	5239.19	107.72	73.48	46.67	9.67	46.36	1.64
111	19457	5263.96	114.36	73.21	45.45	8.67	46.61	1.64
112	19458	6580.44	114.75	71.85	45.62	9.12	46.76	1.67
113	19459	7502.43	122.33	74.31	47.08	6.45	44.07	1.62
114	19460	7145.69	120.81	72.1	44.45	9.68	47.94	1.67
115	19461	5912.07	120.61	72.4	46.01	8.93	46.37	1.66
116	19462	6289.76	126.36	74.78	48.55	8.35	44.21	1.61
117	19464	4967.03	123.39	73.92	47.49	7.18	44.23	1.62
118	19465	2722.74	76.06	70.97	42.17	11.14	50.46	1.69
119	19467	3257.42	85.33	70.52	41.98	11.94	51.1	1.7
120	19470	3069.26	73.56	71.23	43.06	10.95	49.72	1.69
121	19472	3665.21	101.25	70.88	44.05	11	49.04	1.69
122	19473	3067.88	106.08	71.36	41.89	10.9	50.52	1.68
123	19474	3921.98	88.92	71.65	42.13	11.67	50.82	1.68
124	19476	4083.07	103.44	72.63	44.55	10.4	48.32	1.65
125	19479	2541.68	95.44	72.11	45.27	10.11	47.63	1.67
126	19480	2973.53	94.28	72.12	44.71	10.62	48.34	1.67
	LSD 5%	2582.74	29.73	2.68	3.36	2.16	3.18	0.06
	Minimum	1609.65	71.5	69.98	40.4	6.11	43.1	1.59
	Mean	4574.93	103.385	72.3721	44.6241	10.0194	48.0288	1.66048
	Maximum	9097.54	135.22	75.68	48.69	12.21	51.73	1.72
	PGV	163.672	61.6336	7.87597	18.5774	60.8816	17.9684	7.82906
Note:	YLD=Biomass yield (kg/ha/annum), PH=Plant Height (cm), CP=Crude Protein( % of DM), NDF= Neutral Detergent Fibre( % of DM), ADF= Acid Detergent Fibre( % of DM), TDN= Total Digestible Nutrients (% of DM), and DMI= Dry Matter Intake( % of body weight).

## Sheet: Sapp.Table S3
Supplementary Table S3. Minimum, mean and maximum performance of the accessions for during 2015 and 2016 growing seasons.
Traits	2015			2016			Combined
	Min	Max	Mean	Min	Max	Mean	Min	Max	Mean
Biomass yield (kg/ha/annum)	835.76	8648.8	3231.47	2384.54	10267.6	5926.96	1609.65	9097.54	4562.22
Plant height (cm)	30.83	133.82	85.58	85	150.22	121.18	71.5	135.22	103.31
CP (%)	7.98	15.43	12.36	4.24	10.93	8.33	6.11	12.21	10.02
NDF (%)	67.45	75.8	70.42	70.76	76.95	73.78	69.98	75.68	72.37
ADF (%)	35.47	48.41	40.31	43.34	52.22	47.78	40.4	48.69	44.62
TDN (%)	44.95	57.37	52.54	40.05	49.12	44.72	43.1	51.73	48.03
DMI (%)	1.58	1.78	1.71	1.56	1.7	1.63	1.59	1.72	1.66
Note:	YLD=Biomass yield (kg/ha/annum), PH=Plant Height (cm), CP=Crude Protein( % of DM), NDF= Neutral Detergent Fibre( % of DM), ADF= Acid Detergent Fibre( % of DM), TDN= Total Digestible Nutrients (% of DM), and DMI= Dry Matter Intake( % of body weight).

## Sheet: Supp.Table S4
Supplementary Table S4.Mean performance of the genetic clusters identified based on DArTSeq markers.
Cluster	YLD	PH	CP	NDF	ADF	TDN	DMI
I	3966.32	96.3781	10.7794	71.8192	44.0356	48.9179	1.67291
II	3431.09	94.3226	10.509	71.526	43.5951	49.063	1.68059
III	3838.51	97.858	10.6884	72.1737	43.9774	48.9029	1.66453
IV	6465.79	114.917	8.94656	72.2947	45.3944	46.8169	1.66172
V	5229.34	110.064	9.78682	73.102	45.5643	47.2172	1.64361
VI	5035.82	109.791	9.46612	72.9604	45.3595	47.1638	1.64711
VII	3596.91	98.6389	9.81556	72.6149	44.2094	48.197	1.65453
VIII	5553.59	107.533	9.36511	73.0734	45.3865	47.082	1.64413
Note:	YLD=Biomass yield (kg/ha/annum), PH=Plant Height (cm), CP=Crude Protein( % of DM), NDF= Neutral Detergent Fibre( % of DM), ADF= Acid Detergent Fibre( % of DM), TDN= Total Digestible Nutrients (% of DM), and DMI= Dry Matter Intake( % of body weight).

## Sheet: Supp.Table S5
Supplementary Table S5. Number of markers mapped per each chromosome
		#Numbe of marker
Chromosome	RefSeq sequence	SNP	SiliocDArT
Chr1	NC_028450.1	838	978
Chr2	NC_028451.1	934	1145
Chr3	NC_028452.1	886	938
Chr4	NC_028453.1	563	624
Chr5	NC_028454.1	1222	1244
Chr6	NC_028455.1	470	550
Chr7	NC_028456.1	487	803
Chr8	NC_028457.1	274	414
Chr9	NC_028458.1	1504	1617
Pltd	NC_022850.1	2	4
Scaffolds		26	25
Total		7206	8342

## Sheet: Supp.Table S6
Supplementary Table S6. Sequence and chromosome position of SilicoDArT markers associated with biomass yield (YLD, kg/ha/annum) and plant height (PH, cm) using different models during the 2015 and 2016 growing seasons.
No.	Season	Trait	Model	Marker ID	Marker sequence	RefSeq sequence	Chromosome	Position	P.value	Alleles	Minor allele	maf	nobs	R2.without.SNP	R2.with.SNP	R2*	FDR_Adjusted_P-values	Effect	Phenotype_Variance_Explained(%)	Remark
1	2015	PH	BLINK	30823032	TGCAGTCATCGCTAGGGATACGTCCTGGGCTTGCCAGAGAAGAAAACGATTCTCAGAATACTCCAATGG	NC_028457.1	8	8271752	1.07e-07	0/1	1	0.123	110	NA	NA	NA	0.001	NA	NA	NA
2		YLD	BLINK	30837503	TGCAGAAAGAAAATTGGAGCGCAACAACCAACAAAAACATTCCGTGCGGCGTCGTCTCGTCTCGTTCCC	NC_028450.1	1	36135408	1.16e-08	0/1	1	0.073	110	NA	NA	NA	0	NA	NA	NA
3	2016	YLD	FarmCPU	30912865	TGCAGAGAGTTGCAAAACGTATCGAAACAAATGTTGGAGACTTGCCGTGGGGTGAGGTGAAGACGGACT	NC_028451.1	2	30749442	8.86e-07	0/1	1	0.096	114	NA	NA	NA	0.002	1637.99	0.597104	Minor allele has positive effect
		YLD	BLINK	30912865	TGCAGAGAGTTGCAAAACGTATCGAAACAAATGTTGGAGACTTGCCGTGGGGTGAGGTGAAGACGGACT	NC_028451.1	2	30749442	6.33e-06	0/1	1	0.096	114	NA	NA	NA	0.023	NA	NA	NA
4		YLD	FarmCPU	30846154	TGCAGTCTCCCAATCTCCCGTGGGAGCTCTGTGATTTGATCGCAGTCCTTGAGATCCAGATACCTAAGC	NC_028457.1	8	26442566	3.95e-08	0/1	1	0.088	114	NA	NA	NA	0	-1544.8	0.291143	Minor allele has negative effect
		YLD	BLINK	30846154	TGCAGTCTCCCAATCTCCCGTGGGAGCTCTGTGATTTGATCGCAGTCCTTGAGATCCAGATACCTAAGC	NC_028457.1	8	26442566	1.28e-06	0/1	1	0.088	114	NA	NA	NA	0.009	NA	NA	NA
		YLD	GLM	30846154	TGCAGTCTCCCAATCTCCCGTGGGAGCTCTGTGATTTGATCGCAGTCCTTGAGATCCAGATACCTAAGC	NC_028457.1	8	26442566	5.07e-06	0/1	1	0.088	114	0.24258	0.401253	0.158672	0.0331072	-1915.95	NA	Minor allele has negative effect
5		YLD	FarmCPU	30879363	TGCAGTACTTGCATCTACCAAACAAGGTCTACGCGGCAGCATCAAAAGTGCACGATTAGCTGCATCCAG	NC_028458.1	9	2287248	7.33e-07	0/1	0	0.123	114	NA	NA	NA	0.002	-1273.64	1.90895e-08	Minor allele has negative effect
6		YLD	FarmCPU	30865385	TGCAGTAATAACACAATGCACAGAGCATTCATTATTTGGCCTCACTCATCTTTGCCGACCCCG	NC_028458.1	9	8153255	5.24e-06	0/1	1	0.193	114	NA	NA	NA	0.006	1082.18	0.0224091	Minor allele has positive effect
7		YLD	FarmCPU	30848353	TGCAGGAATTTTGAGAAATCTCGGAAAAGAGTGCGAGAAAAAGACCATGCTGAAAGAACCCATGAGCGT	NC_028458.1	9	14097636	4.24e-08	0/1	1	0.158	114	NA	NA	NA	0	2622.59	10.2194	Minor allele has positive effect
8		YLD	FarmCPU	30823057	TGCAGAAACTGAATATCTCTGTTCAGTTCATTTACCTTGGGGTAATTGGCGAAGTTGGTCTTGAGTACA	NC_028458.1	9	55293363	4.37e-06	0/1	0	0.307	114	NA	NA	NA	0.006	1276.13	0	Minor allele has positive effect
Note:	YLD=Biomass yield (kg/ha/annum), PH=Plant height (cm)
	*R2 =R2.with SNP - R2 without SNP

## Sheet: Supp.Table S7
Supplementary Table S7. Summary of SNP markers associated with biomass yield (kg/ha/annum) in 2016 growing season
No.	Model	SNP	Sequence	RefSeq sequence	Chromosome	Position	Alleles	Minor allele	maf	P.value	nobs	R2.without.SNP	R2.with.SNP	R2*	FDR_Adjusted_P-values	effect	Phenotype_Variance_Explained(%)	Remark
1	BLINK	30964292|F|0-59:G>A-59:G>A	TGCAGCTCAGAGCAGTACGACGCCATGGCGATCTCGGCGCCCTTGAACCCGTAGTCCAGGCTCGGGTTG	NC_028450.1	1	31786540	G/A	A	0.184211	8.41e-06	114	NA	NA	NA	0.049048	NA	NA
	GLM	30964292|F|0-59:G>A-59:G>A	TGCAGCTCAGAGCAGTACGACGCCATGGCGATCTCGGCGCCCTTGAACCCGTAGTCCAGGCTCGGGTTG	NC_028450.1	1	31786540	G/A	A	0.184211	3.04e-06	114	0.33745	0.483469	0.146018	0.017718	-1528.83	NA	Minor allele has negative effect
2	FarmCPU	30945264|F|0-46:G>A-46:G>A	TGCAGTGGTTCAAGGAGGAAGGGCAGAGCAGGATCAGGGCGCATTCGGGGCCGCGCATGGAGGGCACGT	NC_028452.1	3	9606986	G/A	A	0.100877	9.05e-06	114	NA	NA	NA	0.026364	1400.73	7.01821	Minor allele has positive effect
3	FarmCPU	30939756|F|0-41:T>C-41:T>C	TGCAGAGAACCCAGACATGGCAAGCAGCTTGCTTCACTGGCTGCCGATCTCCATGAGCAGCCAGTCCTT	NC_028452.1	3	48480075	T/C	C	0.131579	8.04e-06	114	NA	NA	NA	0.026364	-1134.1	3.77484	Minor allele has negative effect
*R2 =R2.with SNP - R2 without SNP

## Sheet: Supp.Table S8
Supplementary Table S8. SilicoDArT markers associated with feed quality using the 2015 and 2016 growning seasons data.
No.	Season	Trait	model	Marker ID	Marker sequence	RefSeq sequence	Chromosome	Position	Alleles	Minor allele	maf	P.value	R2.without.SNP	R2.with.SNP	R2*	FDR_Adjusted_P-values	Effect	Phenotype Variance Explained(%)	Remark
1	2015	CP	BLINK	30854735	TGCAGAATTGGGCCAACTTGTCACATATTCTGGCCCACAGCCG	NC_028450.1	1	31387955	0/1	1	0.095	6.99e-07	NA	NA	NA	0.003	NA	NA
2		CP	BLINK	30873734	TGCAGTGAGCAGGCTGCAAGTGCGCCTCCG	NC_028451.1	2	15097089	0/1	1	0.086	2.76e-06	NA	NA	NA	0.005	NA	NA
3		CP	BLINK	30879386	TGCAGTAGTGGCGGTGGACTACGACGCCTCCCCCTGCGAGCACATCATATCCCAGACGCCTGCTCGACG	NC_028454.1	5	1406759	0/1	0	0.273	1.19e-06	NA	NA	NA	0.003	NA	NA
4		CP	BLINK	30887996	TGCAGTCCTTCATCCCCACACATCGCTATCGTACTCGGAAATACCACAGCTTTTCCCAACTCCTTGCAT	NC_028455.1	6	568068	0/1	1	0.132	8.58e-09	NA	NA	NA	0	NA	NA
7	2016	CP	BLINK	30935514	TGCAGAACGTTCAGACTTCAAACTACATGCTGCCGTGCGCATCAGCACATGTGCTGACTTGTGACCTGT	NC_028454.1	5	6158000	0/1	1	0.215	6.74e-07	NA	NA	NA	0.002	NA	NA
8		CP	BLINK	30963505	TGCAGAATCCACAGAGTAGTGGATGCAGACGAACCAGATGGAGTCCCTGACGCAGGCCATGGTCCAGGT	NC_028458.1	9	2503878	0/1	1	0.075	1.24e-09	NA	NA	NA	0	NA	NA
9		TDN	BLINK	30879386	TGCAGTAGTGGCGGTGGACTACGACGCCTCCCCCTGCGAGCACATCATATCCCAGACGCCTGCTCGACG	NC_028454.1	5	1406759	0/1	0	0.272	1.32e-09	NA	NA	NA	0	NA	NA
		TDN	GLM	30879386	TGCAGTAGTGGCGGTGGACTACGACGCCTCCCCCTGCGAGCACATCATATCCCAGACGCCTGCTCGACG	NC_028454.1	5	1406759	0/1	0	0.272	1.73e-06	0.0843665	0.297601	0.213234	0.013	1.604	NA	Minor allele has positive effect
10		TDN	FarmCPU	30885054	TGCAGGTACCAGGCCTACGAGCTGATCCACGCCAGGTGGGCTATGCTCGGCGCCGCCG	NC_028457.1	8	8837040	0/1	1	0.136	1.28e-09	NA	NA	NA	0	2.365	NA	Minor allele has positive effect
11		TDN	FarmCPU	30823057	TGCAGAAACTGAATATCTCTGTTCAGTTCATTTACCTTGGGGTAATTGGCGAAGTTGGTCTTGAGTACA	NC_028458.1	9	55293363	0/1	0	0.307	4.47e-06	NA	NA	NA	0.017	-1.258	NA	Minor allele has negative effect
Note:	CP=Crude protein (% of DM), TDN= total digestible nutrients( % of DM)
	*R2 =R2.with SNP - R2 without SNP

## Sheet: Supp.Table S9
Supplementary Table S9. List of SNP markers associated with feed quality traits using the combined data from 2015 and 2016 growing seasons.
No.	No.	Marker type	Season	Trait	Model	Marker ID	Marker sequence	RefSeq sequence	Chr	pos	Alleles	Minor Allele	maf	P.value	R2.without.SNP	R2.with.SNP	R2*	FDR_Adjusted_P-values	Effect	Remark
1	1	SNP	combined	CP	GLM	30940141-28-G/T	TGCAGCACCTCTTCGCCAGGCCGTTCCTGGGGCTCATCACCAAGCACTTCTCCGTGCTGTACGACGTCG	NC_028450.1	1	30453127	G/T	T	0.0583333	4.41165e-07	0.276648	0.455559	0.178912	0.0003608	-1.20157	Minor allele has negative effect
	2	SNP	combined	TDN	GLM	30940141-28-G/T	TGCAGCACCTCTTCGCCAGGCCGTTCCTGGGGCTCATCACCAAGCACTTCTCCGTGCTGTACGACGTCG	NC_028450.1	1	30453127	G/T	T	0.0583333	1.20069e-06	0.261661	0.429002	0.16734	0.00176499	-1.78053	Minor allele has negative effect
2	8	SNP	combined	CP	FarmCPU	30913706-11-C/A	TGCAGCTCAAACCCTCTCTCCACCGCGTAGTCCACGAAGCTGTACAAGGGGAGCACCCG	NC_028450.1	1	33950933	C/A	A	0.204167	4.78239e-06	NA	NA	NA	0.0058668	-0.666413	Minor allele has negative effect
2	12	SNP	combined	NDF	Blink	30954394-51-G/A	TGCAGGTTGGCGATCAGGACCACCTCGTTCATGAACTCGTTCAGGCCTTGCGCCGTGTTCTCCGCCGAG	NC_028451.1	2	10546100	G/A	A	0.1	1.10761e-10	NA	NA	NA	2.71751e-07	NA
3	14	SNP	combined	CP	GLM	30953100-29-C/A	TGCAGCACGACGTCGACGACGGAGCCGAACCGCAGCCG	NC_028451.1	2	28236982	C/A	A	0.075	4.1049e-07	0.276648	0.456648	0.18	0.0003608	-1.10853	Minor allele has negative effect
4	18	SNP	combined	CP	GLM	30936363-40-G/C	TGCAGCCCAGCAGCTTGACCAGGTTCTTGTGCTGCACCTGGCTGACGAGCTTCACCTCGTTGAAGAACT	NC_028452.1	3	3196557	G/C	C	0.0666667	3.97452e-07	0.276648	0.457136	0.180489	0.0003608	-1.20161	Minor allele has negative effect
	19	SNP	combined	TDN	GLM	30936363-40-G/C	TGCAGCCCAGCAGCTTGACCAGGTTCTTGTGCTGCACCTGGCTGACGAGCTTCACCTCGTTGAAGAACT	NC_028452.1	3	3196557	G/C	C	0.0666667	3.62846e-06	0.261661	0.412473	0.150811	0.0022256	-1.68296	Minor allele has negative effect
5	22	SNP	combined	NDF	FarmCPU	30922867-51-G/T	TGCAGGCGCTCCACCACGCCAAGAGCGGCGTCGACGTCGTGTCCGGGACGCGGGTGCGCACGCACTTCG	NC_028452.1	3	44180953	G/T	T	0.0666667	1.81743e-06	NA	NA	NA	0.00178363	-0.761594	Minor allele has negative effect
	23	SNP	combined	TDN	FarmCPU	30922867-51-G/T	TGCAGGCGCTCCACCACGCCAAGAGCGGCGTCGACGTCGTGTCCGGGACGCGGGTGCGCACGCACTTCG	NC_028452.1	3	44180953	G/T	T	0.0666667	1.39234e-06	NA	NA	NA	0.00124124	0.935421	Minor allele has negative effect
6	30	SNP	combined	DMI	Blink	30923433-25-A/C	TGCAGTATGAGTTCCATCATGGAAAAGGATGACTGATTAGTACCTCTAGAAACAACAAATCCACCCAAA	NC_028453.1	4	32801233	A/C	C	0.183333	2.41831e-09	NA	NA	NA	1.18666e-05	NA
	31	SNP	combined	ADF	GLM	30923433-25-A/C	TGCAGTATGAGTTCCATCATGGAAAAGGATGACTGATTAGTACCTCTAGAAACAACAAATCCACCCAAA	NC_028453.1	4	32801233	A/C	C	0.183333	4.84062e-06	0.206275	0.363832	0.157557	0.0168945	1.07997
	32	SNP	combined	TDN	GLM	30923433-25-A/C	TGCAGTATGAGTTCCATCATGGAAAAGGATGACTGATTAGTACCTCTAGAAACAACAAATCCACCCAAA	NC_028453.1	4	32801233	A/C	C	0.183333	1.33397e-06	0.261661	0.427413	0.165751	0.00176499	-1.17535	Minor allele has negative effect
7	41	SNP	combined	CP	GLM	30935961-51-C/T	TGCAGATCTACTAAAATCTAGCCGCGCCAGCAGCGACGCGAACCGCTAAATCCACCCAAACCTAGCACC	NC_028454.1	5	3450894	C/T	T	0.0583333	5.06877e-06	0.276648	0.419573	0.142925	0.00165816	-1.07299	Minor allele has negative effect
8	44	SNP	combined	DMI	FarmCPU	30922495-47-A/G	TGCAGCTTGCGCTCGATCTCGAGGGAGAGCGCCTCGAGGCGGTCGGAAGAGCTCCGGCCCCGCATGGCC	NC_028454.1	5	8813508	A/G	G	0.279167	5.39342e-07	NA	NA	NA	0.000882184	0.012218	Minor allele has positive effect
9	45	SNP	combined	TDN	FarmCPU	30941555-64-T/C	TGCAGCTTGCGCTCGATCTCGAGGGAGAGCGCCTCGAGGCGGTCGGAAGAGCTCCGGCCCCGCATGGCC	NC_028454.1	5	9685427	T/C	C	0.0958333	2.98896e-07	NA	NA	NA	0.000488894	-1.36724	Minor allele has negative effect
10	47	SNP	combined	ADF	Blink	30910852-44-C/A	TGCAGGCACTGGAGCATCTCAAGATGCAGCCAAGAACAGAAAAGCAAAAAAGATACCATCACGGATCAG	NC_028454.1	5	11247610	C/A	A	0.2	1.66291e-11	NA	NA	NA	8.15991e-08	NA
11	48	SNP	combined	NDF	GLM	30920709-11-G/C	TGCAGTGTGGGGTGCGAGTTCTTGTGTCTGTCGCCCACCACTTCCTTCTTGGGGTGAAATCCGCTGCCT	NC_028454.1	5	12023194	G/C	C	0.1375	9.2343e-06	0.17183	0.325649	0.153818	0.0134465	-1.36593	Minor allele has negative effect
	49	SNP	combined	DMI	GLM	30920709-11-G/C	TGCAGTGTGGGGTGCGAGTTCTTGTGTCTGTCGCCCACCACTTCCTTCTTGGGGTGAAATCCGCTGCCT	NC_028454.1	5	12023194	G/C	C	0.1375	9.14824e-06	0.173577	0.327223	0.153646	0.0141421	0.0314733	Minor allele has positive effect
12	50	SNP	combined	TDN	FarmCPU	30882407-14-C/T	TGCAGCCGCGACGACTCCTTCCGCTGCTTCTCCCG	NC_028454.1	5	12457899	C/T	T	0.3	5.45518e-07	NA	NA	NA	0.000669215	-0.683001	Minor allele has negative effect
13	51	SNP	combined	CP	Blink	30915968-46-A/G	TGCAGCAGCTGTGAGCCTGTGACCAGCGAAAACACTGTCGCCGCCCACACAAATCGCACGCACTCCCTA	NC_028454.1	5	13051998	A/G	G	0.166667	8.43066e-06	NA	NA	NA	0.0110027	NA
14	52	SNP	combined	CP	GLM	30914313-48-A/T	TGCAGTAGAACAATTTGAGGGTTTCGAGGGAGGCGATCTTGAGGAGGGACCCCG	NC_028454.1	5	35913207	A/T	T	0.0583333	1.13007e-06	0.276648	0.441489	0.164842	0.000586387	-1.23541	Minor allele has negative effect
	53	SNP	combined	TDN	GLM	30914313-48-A/T	TGCAGTAGAACAATTTGAGGGTTTCGAGGGAGGCGATCTTGAGGAGGGACCCCG	NC_028454.1	5	35913207	A/T	T	0.0583333	6.79253e-06	0.261661	0.403263	0.141602	0.00271066	-1.75441	Minor allele has negative effect
15	54	SNP	combined	ADF	Blink	30943867-5-C/G	TGCAGCCACGCGTGGAAAGGCCACGTCGGCGCGTACGCCTAAAAAAACGGGTGGAAATCAGCGTCCACG	NC_028454.1	5	36880470	C/G	G	0.0916667	1.44291e-07	NA	NA		0.000177009	NA
16	55	SNP	combined	NDF	GLM	30933559-6-G/C	TGCAGTGGTGATGTGACCTCTATAAGCAAGATTCTTCTCCACCCAGAAGGAGCGATAATTGCAATTCCG	NC_028454.1	5	41420696	G/C	C	0.1125	3.9351e-06	0.17183	0.339646	0.167816	0.00965478	-1.42347	Minor allele has negative effect
	56	SNP	combined	DMI	GLM	30933559-6-G/C	TGCAGTGGTGATGTGACCTCTATAAGCAAGATTCTTCTCCACCCAGAAGGAGCGATAATTGCAATTCCG	NC_028454.1	5	41420696	G/C	C	0.1125	3.27071e-06	0.173577	0.344099	0.170522	0.00836162	0.0330811	Minor allele has positive effect
17	59	SNP	combined	NDF	FarmCPU	30966113-5-T/C	TGCAGTGACGACCCCACCGCGAACCGCAGCACGAACTTGCCGCCGACCACCGTGTGGGCCAGGTATGCC	NC_028455.1	6	5788477	T/C	C	0.245833	1.42145e-09	NA	NA	NA	3.48753e-06	-0.894749	Minor allele has negative effect
	60	SNP	combined	TDN	FarmCPU	30966113-5-T/C	TGCAGTGACGACCCCACCGCGAACCGCAGCACGAACTTGCCGCCGACCACCGTGTGGGCCAGGTATGCC	NC_028455.1	6	5788477	T/C	C	0.245833	1.51771e-06	NA	NA	NA	0.00124124	0.870586	Minor allele has positive effect
	61	SNP	combined	DMI	FarmCPU	30966113-5-T/C	TGCAGTGACGACCCCACCGCGAACCGCAGCACGAACTTGCCGCCGACCACCGTGTGGGCCAGGTATGCC	NC_028455.1	6	5788477	T/C	C	0.245833	3.49772e-10	NA	NA	NA	1.71633e-06	0.0215552	Minor allele has positive effect
	62	SNP	combined	TDN	Blink	30966113-5-T/C	TGCAGTGACGACCCCACCGCGAACCGCAGCACGAACTTGCCGCCGACCACCGTGTGGGCCAGGTATGCC	NC_028455.1	6	5788477	T/C	C	0.245833	2.57972e-06	NA	NA	NA	0.00900122	NA
18	63	SNP	combined	NDF	Blink	30929744-40-G/C	TGCAGCAGCAGGTCGAGCGCCGACGGCGTGGGCGGCGCGTGGTTATGGTGACCCG	NC_028455.1	6	28755871	G/C	C	0.204167	7.06586e-10	NA	NA	NA	1.15574e-06	NA
19	64	SNP	combined	TDN	GLM	30923672-36-C/A	TGCAGTGGTGGTTGCGCTGCGCGCCCTCGGCTCCAGCCATTTTGAGGTAGGCGGCGGAGGGGAGGCGAC	NC_028455.1	6	29321064	C/A	A	0.108333	6.91403e-06	0.261661	0.403004	0.141343	0.00271066	1.6986	Minor allele has positive effect
20	66	SNP	combined	TDN	FarmCPU	30926634-58-G/A	TGCAGATGCTCGTCAAGCTGACGGGCGCCAGGAACACGCTGGAGGTGGGCGTGTTCACGGGCTACTCGC	NC_028455.1	6	31909657	G/A	A	0.0583333	4.29272e-09	NA	NA	NA	1.05322e-05	1.53498	Minor allele has positive effect
	67	SNP	combined	TDN	Blink	30926634-58-G/A	TGCAGATGCTCGTCAAGCTGACGGGCGCCAGGAACACGCTGGAGGTGGGCGTGTTCACGGGCTACTCGC	NC_028455.1	6	31909657	G/A	A	0.0583333	3.66873e-06	NA	NA	NA	0.00900122	NA
21	68	SNP	combined	NDF	Blink	30924668-21-A/G	TGCAGAGCCAAGGGCACGGCGACAGCCTCGCGGCCG	NC_028455.1	6	32162267	A/G	G	0.179167	9.49143e-07	NA	NA	NA	0.000776241	NA
22	70	SNP	combined	TDN	GLM	30949966-47-C/G	TGCAGGAACTTCTGGATGGGGAAGTTGAAGGCGTAGGCGAAGAGCTGCGGGATCATGTAGATGGCGAGC	NC_028455.1	6	35084628	C/G	G	0.0625	2.11367e-06	0.261661	0.420504	0.158842	0.00176499	-2.30045	Minor allele has negative effect
23	71	SNP	combined	ADF	Blink	30956535-41-C/T	TGCAGAAATCGCAGAGATTCTTCGTTCTTGGCCACTCTGTTCGTCCACTCATTTGTTTGTTCCCCGCGG	NC_028456.1	7	20184973	C/T	T	0.0541667	3.78461e-11	NA	NA	NA	9.28555e-08	NA
	72	SNP	combined	CP	GLM	30956535-41-C/T	TGCAGAAATCGCAGAGATTCTTCGTTCTTGGCCACTCTGTTCGTCCACTCATTTGTTTGTTCCCCGCGG	NC_028456.1	7	20184973	C/T	T	0.0541667	9.92351e-08	0.276648	0.478407	0.201759	0.000243473	-1.40177	Minor allele has negative effect
	73	SNP	combined	TDN	GLM	30956535-41-C/T	TGCAGAAATCGCAGAGATTCTTCGTTCTTGGCCACTCTGTTCGTCCACTCATTTGTTTGTTCCCCGCGG	NC_028456.1	7	20184973	C/T	T	0.0541667	5.41585e-07	0.261661	0.441126	0.179465	0.00176499	-2.02567	Minor allele has negative effect
25	74	SNP	combined	CP	GLM	30891911-50-G/A	TGCAGCCGCAGCGTGCTGCTGGAGTGCAGCTCGCCCGACGAGCAGCGGCTGTCGCCGCCG	NC_028456.1	7	20221482	G/A	A	0.0708333	1.74327e-06	0.276648	0.435092	0.158444	0.000712851	-1.1157	Minor allele has negative effect
26	77	SNP	combined	CP	GLM	30899873-7-G/A	TGCAGCCGCGCCAGGTGGCCATCTGGTTCCAGAACAAGCGCGCCCG	NC_028456.1	7	26206778	G/A	A	0.0625	6.19936e-07	0.276648	0.450441	0.173793	0.000434575	-1.13743	Minor allele has negative effect
	78	SNP	combined	TDN	GLM	30899873-7-G/A	TGCAGCCGCGCCAGGTGGCCATCTGGTTCCAGAACAAGCGCGCCCG	NC_028456.1	7	26206778	G/A	A	0.0625	2.51782e-06	0.261661	0.417894	0.156232	0.00176499	-1.65239	Minor allele has negative effect
27	79	SNP	combined	NDF	FarmCPU	30944559-10-G/A	TGCAGGCACAGGAAGAGACACACAGCTATGGCTTCCAAGTCCCAGCTTCTGCTCTTCGCTGCGATTGCA	NC_028456.1	7	26614914	G/A	A	0.0833333	1.98587e-10	NA	NA	NA	9.74464e-07	-1.74645	Minor allele has negative effect
	80	SNP	combined	NDF	Blink	30944559-10-G/A	TGCAGGCACAGGAAGAGACACACAGCTATGGCTTCCAAGTCCCAGCTTCTGCTCTTCGCTGCGATTGCA	NC_028456.1	7	26614914	G/A	A	0.0833333	6.68323e-12	NA	NA	NA	3.27946e-08	NA
	81	SNP	combined	NDF	GLM	30944559-10-G/A	TGCAGGCACAGGAAGAGACACACAGCTATGGCTTCCAAGTCCCAGCTTCTGCTCTTCGCTGCGATTGCA	NC_028456.1	7	26614914	G/A	A	0.0833333	2.89807e-06	0.17183	0.344725	0.172895	0.00965478	-1.68208	Minor allele has negative effect
	82	SNP	combined	DMI	GLM	30944559-10-G/A	TGCAGGCACAGGAAGAGACACACAGCTATGGCTTCCAAGTCCCAGCTTCTGCTCTTCGCTGCGATTGCA	NC_028456.1	7	26614914	G/A	A	0.0833333	3.40804e-06	0.173577	0.343417	0.169841	0.00836162	0.0384356	Minor allele has positive effect
28	87	SNP	combined	TDN	GLM	30922705-40-G/A	TGCAGGAGTACTTGCGCTTGTTCTTGAGGCACAGCGGCAGGCCCAGGATCCGCCGCTCGCTCTCCACGT	NC_028456.1	7	29258287	G/A	A	0.116667	7.45653e-06	0.261661	0.401903	0.140242	0.00271066	1.63971	Minor allele has positive effect
29	88	SNP	combined	ADF	Blink	30949184-6-G/C	TGCAGAGAGTCCTTTTCGCTTCCTGGTACTGAATGCGATGGCATTGCTTGCACGTTTGTGCACGGTGGT	NC_028456.1	7	30338443	G/C	C	0.075	3.24893e-06	NA	NA	NA	0.0031885	NA
30	89	SNP	combined	CP	FarmCPU	30963111-10-G/T	TGCAGATTCAGGAGCGCACAATTCAATCAAAGTGGCGTCCAGTTCGGAAGACACGGACAGATGGGTATT	NC_028457.1	8	1662782	G/T	G	0.270833	2.52681e-07	NA	NA	NA	0.000413302	0.52099	Minor allele has positive effect
31	102	SNP	combined	CP	GLM	30882726-13-A/T	TGCAGCTGCGAACATCGGATGCTTGTACCTGACAGTTAAGCCG	NC_028458.1	9	3086631	A/T	T	0.108333	4.9632e-06	0.276648	0.419876	0.143228	0.00165816	1.1074	Minor allele has positive effect
32	103	SNP	combined	ADF	Blink	30916081-66-T/C	TGCAGCCAACGTATTTTCCCAGTCCCTCCTTCAACCTCTTGCCTGAACAAGTAAGACTGTTCTGAATCT	NC_028458.1	9	5345323	T/C	C	0.108333	2.91664e-09	NA	NA	NA	4.77065e-06	NA
33	104	SNP	combined	NDF	FarmCPU	30950127-48-G/C	TGCAGGCCGCTGCCGACCAGATCTTCGATGCCGTCACCAAGCGAGTAGGTGCCATCGTGCTCTCCGAGA	NC_028458.1	9	7269453	G/C	C	0.108333	1.30812e-07	NA	NA	NA	0.000213965	-0.850405	Minor allele has negative effect
34	107	SNP	combined	CP	GLM	30958237-42-G/C	TGCAGGAGGTGCTGCCTCGGCATCACGCTTGCTGGCCTCCTCGGCGGCGGCGGCGTCCTCGACGGCGTC	NC_028458.1	9	10924954	G/C	C	0.216667	1.195e-06	0.276648	0.440662	0.164014	0.000586387	-0.783064	Minor allele has negative effect
	108	SNP	combined	TDN	GLM	30958237-42-G/C	TGCAGGAGGTGCTGCCTCGGCATCACGCTTGCTGGCCTCCTCGGCGGCGGCGGCGTCCTCGACGGCGTC	NC_028458.1	9	10924954	G/C	C	0.216667	5.55146e-06	0.261661	0.406214	0.144552	0.00271066	-1.12639	Minor allele has negative effect
35	110	SNP	combined	CP	FarmCPU	30904024-13-C/T	TGCAGGCGCAGAGCATCGTGGCGCCCAGCGCCTACATCTCCGCCGCCACGCTGGTGCTCCACCTGGCGC	NC_028458.1	9	12719497	C/T	T	0.25	3.73279e-13	NA	NA	NA	1.83168e-09	-0.846058	Minor allele has negative effect
	111	SNP	combined	TDN	FarmCPU	30904024-13-C/T	TGCAGGCGCAGAGCATCGTGGCGCCCAGCGCCTACATCTCCGCCGCCACGCTGGTGCTCCACCTGGCGC	NC_028458.1	9	12719497	C/T	T	0.25	4.35064e-13	NA	NA	NA	2.13486e-09	-1.19845	Minor allele has negative effect
	112	SNP	combined	CP	GLM	30904024-13-C/T	TGCAGGCGCAGAGCATCGTGGCGCCCAGCGCCTACATCTCCGCCGCCACGCTGGTGCTCCACCTGGCGC	NC_028458.1	9	12719497	C/T	T	0.25	1.07391e-06	0.276648	0.442245	0.165597	0.000586387	-0.821632	Minor allele has negative effect
	113	SNP	combined	TDN	GLM	30904024-13-C/T	TGCAGGCGCAGAGCATCGTGGCGCCCAGCGCCTACATCTCCGCCGCCACGCTGGTGCTCCACCTGGCGC	NC_028458.1	9	12719497	C/T	T	0.25	1.6956e-06	0.261661	0.423804	0.162143	0.00176499	-1.24571	Minor allele has negative effect
36	116	SNP	combined	CP	Blink	30923660-16-A/C	TGCAGTGGGACAGGATAGAGGACAAGTACGCGGTGACCACGCTCGGCGTCGCGGCCACGCTCGGCATGT	NC_028458.1	9	40288954	A/C	C	0.229167	7.42586e-07	NA	NA	NA	0.00182194	NA
37	120	SNP	combined	CP	GLM	30885897-53-A/G	TGCAGAGAAACGCAAGGAGCACGTGAACGCCTTCTTCAGAACAGTAAGGCCGTAATTCACACCAAACAC	NC_028458.1	9	52057053	A/G	G	0.0916667	2.06265e-06	0.276648	0.432624	0.155976	0.000778569	-1.21383	Minor allele has negative effect
38	121	SNP	combined	NDF	FarmCPU	30930026-21-G/T	TGCAGCTCGGGCGGGCACAGCGCGTTCACGTCCCCGACGCACCCG	NC_028458.1	9	52346933	G/T	T	0.0833333	1.65954e-06	NA	NA	NA	0.00178363	-0.731558	Minor allele has negative effect
	122	SNP	combined	NDF	Blink	30930026-21-G/T	TGCAGCTCGGGCGGGCACAGCGCGTTCACGTCCCCGACGCACCCG	NC_028458.1	9	52346933	G/T	T	0.0833333	6.78286e-09	NA	NA	NA	6.6567e-06	NA
39	123	SNP	combined	CP	GLM	30957352-40-A/C	TGCAGTGCAGGAAGACGGGAAGAACTTTCTAACGCTACGCACGCGCGATTGGGATCGGGCCATCGGGGT	NC_028458.1	9	52469963	A/C	C	0.0708333	4.23838e-07	0.276648	0.456165	0.179517	0.0003608	-1.16691	Minor allele has negative effect
	124	SNP	combined	TDN	GLM	30957352-40-A/C	TGCAGTGCAGGAAGACGGGAAGAACTTTCTAACGCTACGCACGCGCGATTGGGATCGGGCCATCGGGGT	NC_028458.1	9	52469963	A/C	C	0.0708333	2.34959e-06	0.261661	0.418924	0.157263	0.00176499	-1.67346	Minor allele has negative effect
40	125	SNP	combined	CP	FarmCPU	30949394-8-A/G	TGCAGCAGAGGCCAGAAGCATTAGAAGCGGCAGTGGTAACCAAGTGGCATCAGTAGATAGAGCCAGCCA	NC_028458.1	9	55147791	A/G	G	0.0541667	6.58359e-10	NA	NA	NA	1.61528e-06	-1.25566	Minor allele has negative effect
	126	SNP	combined	CP	Blink	30949394-8-A/G	TGCAGCAGAGGCCAGAAGCATTAGAAGCGGCAGTGGTAACCAAGTGGCATCAGTAGATAGAGCCAGCCA	NC_028458.1	9	55147791	A/G	G	0.0541667	2.43638e-13	NA	NA	NA	1.19553e-09	NA
	127	SNP	combined	CP	GLM	30949394-8-A/G	TGCAGCAGAGGCCAGAAGCATTAGAAGCGGCAGTGGTAACCAAGTGGCATCAGTAGATAGAGCCAGCCA	NC_028458.1	9	55147791	A/G	G	0.0541667	1.16212e-08	0.276648	0.512402	0.235754	5.70252e-05	-1.6759	Minor allele has negative effect
	128	SNP	combined	TDN	GLM	30949394-8-A/G	TGCAGCAGAGGCCAGAAGCATTAGAAGCGGCAGTGGTAACCAAGTGGCATCAGTAGATAGAGCCAGCCA	NC_028458.1	9	55147791	A/G	G	0.0541667	7.73371e-06	0.261661	0.401372	0.13971	0.00271066	-1.97675	Minor allele has negative effect
41	131	SNP	combined	CP	GLM	30902432-46-T/G	TGCAGAGTGCAGAGCTGCTGTGGTCACCCGTCACATCCGAGAGTTATGAACCGTGTGATGCTGACCCAT	NC_028458.1	9	56930565	T/G	G	0.0583333	1.51483e-06	0.276648	0.437159	0.160511	0.000675754	-1.13597	Minor allele has negative effect
	132	SNP	combined	TDN	GLM	30902432-46-T/G	TGCAGAGTGCAGAGCTGCTGTGGTCACCCGTCACATCCGAGAGTTATGAACCGTGTGATGCTGACCCAT	NC_028458.1	9	56930565	T/G	G	0.0583333	4.81639e-06	0.261661	0.408298	0.146637	0.002626	-1.66363	Minor allele has negative effect
	134	SNP	combined	DMI	FarmCPU	30931388-60-T/C	TGCAGATGGACTTCTACAGCAACACGTGCCCGCGCGTGGAGGAGATCGTCAAGGAGGAGATGGTGGAGA	NW_014576735.1	Scaffold	109535	T/C	T	0.320833	4.87071e-08	NA	NA	NA	0.000119503	-0.0192295	Minor allele has negative effect
42	135	SNP	combined	NDF	Blink	30931388-60-T/C	TGCAGATGGACTTCTACAGCAACACGTGCCCGCGCGTGGAGGAGATCGTCAAGGAGGAGATGGTGGAGA	NW_014576735.1	Scaffold	109535	T/C	T	0.320833	1.02885e-09	NA	NA	NA	1.26214e-06	NA
Note:	CP=Crude protein (% of DM), NDF= Neutral Detergent Fibre ( % of DM), ADF= Acid Detergent Fibre ( % of DM), TDN= total digestible nutrients (% of DM), and DMI= dry matter intake (% of body weight).
*R2 =R2.with SNP - R2 without SNP

## Sheet: Supp.Table S10
Supplementary Table S10. SNP markers associated with feed quality traits in 2016 growing season.
No.	Trait	Model	Marker ID	Marker sequence	RefSeq sequence	Chromosome	Position	Alleles	Minor Allele	maf	P.value	R2without.SNP	R2with.SNP	FDR_Adjusted_P-values	Effect	Remark
1	TDN	FarmCPU	30910508|F|0-25:G>T-25:G>T	TGCAGCTGCTCCTGAAACGCCTTGGGCAACAGCATCGGCAGCAGGATCGTCTTCGTGGCCTCCG	NC_028452.1	3	50344161	G/T	T	0.11	2.64e-06	NA	NA	0.015	1.03	Minor allele has positive effect
		BLINK	30910508|F|0-25:G>T-25:G>T	TGCAGCTGCTCCTGAAACGCCTTGGGCAACAGCATCGGCAGCAGGATCGTCTTCGTGGCCTCCG	NC_028452.1	3	50344161	G/T	T	0.11	1.93e-07	NA	NA	0.001	NA
2		BLINK	30910363|F|0-40:T>A-40:T>A	TGCAGCTATCTGTATCTATGTATGTTTTGGGTGCTAGTGCTAAAAATAGTGCTACTGGACTAGTGTGTT	NC_028458.1	9	15259487	T/A	A	0.044	2.09e-07	NA	NA	0.001	NA
3		BLINK	30966113|F|0-5:T>C-5:T>C	TGCAGTGACGACCCCACCGCGAACCGCAGCACGAACTTGCCGCCGACCACCGTGTGGGCCAGGTATGCC	NC_028455.1	6	5788477	T/C	C	0.254	7.68e-07	NA	NA	0.001	NA
4		BLINK	30922705|F|0-40:G>A-40:G>A	TGCAGGAGTACTTGCGCTTGTTCTTGAGGCACAGCGGCAGGCCCAGGATCCGCCGCTCGCTCTCCACGT	NC_028456.1	7	29258287	G/A	A	0.118	6.54e-07	NA	NA	0.001	NA
5	CP	BLINK	30899674|F|0-6:A>C-6:A>C	TGCAGCAAGAACGCCAAGCACTGTGACCTCATCCG	NC_028458.1	9	1785762	A/C	A	0.386	2.2e-08	NA	NA	0	NA
		GLM	30899674|F|0-6:A>C-6:A>C	TGCAGCAAGAACGCCAAGCACTGTGACCTCATCCG	NC_028458.1	9	1785762	A/C	A	0.386	9.82e-06	0.191	0.349	0.057	-0.795	Minor allele has positive effect
6		FarmCPU	30915490|F|0-46:G>C-46:G>C	TGCAGAGGACGGCGCGGGAGTCGCCGCAGTTGGCGACGACGAGATGGCGCGGCCCCACCACGGCGACGA	NC_028458.1	9	50585246	G/C	C	0.048	2.23e-06	NA	NA	0.013	1.353	Minor allele has positive effect
7	ADF	FarmCPU	30938070|F|0-67:T>C-67:T>C	TGCAGTTCAGGATGAATCCTTGGAAGCCATGGCTCAGGGCGAAGAGATCGCGCTGGAGGACGACCGATT	NC_028458.1	9	50793159	T/C	C	0.039	1.01e-05	NA	NA	0.015	2.068	Minor allele has positive effect
8		FarmCPU	30941532|F|0-23:C>T-23:C>T	TGCAGTACAGCCCCACACCAGTTCTGCCACAAAGTCAAGATCGTTTCTTTCTTCTCTGATAATGTTGTG	NC_028458.1	9	58315824	C/T	T	0.232	7.51e-08	NA	NA	0	1.949	Minor allele has positive effect
9		BLINK	30952296|F|0-49:T>G-49:T>G	TGCAGGCATTCTCCAGAACCCTGCATTACCACATGACGGCAATGTTCATTCCAACGGTAAGCGAACGAA	NC_028450.1	1	41851240	T/G	G	0.154	1.73e-06	NA	NA	0.004	NA
10		FarmCPU	30910852|F|0-44:C>A-44:C>A	TGCAGGCACTGGAGCATCTCAAGATGCAGCCAAGAACAGAAAAGCAAAAAAGATACCATCACGGATCAG	NC_028454.1	5	11247610	C/A	A	0.193	1.35e-09	NA	NA	0	1.703	Minor allele has positive effect
11		BLINK	30926634|F|0-58:G>A-58:G>A	TGCAGATGCTCGTCAAGCTGACGGGCGCCAGGAACACGCTGGAGGTGGGCGTGTTCACGGGCTACTCGC	NC_028455.1	6	31909657	G/A	A	0.061	2.23e-06	NA	NA	0.004	NA
12		BLINK	30904024|F|0-13:C>T-13:C>T	TGCAGGCGCAGAGCATCGTGGCGCCCAGCGCCTACATCTCCGCCGCCACGCTGGTGCTCCACCTGGCGC	NC_028458.1	9	12719497	C/T	T	0.237	9.31e-14	NA	NA	0	NA
13		FarmCPU	30961288|F|0-34:T>C-34:T>C	TGCAGGTCGCGGTGTCCTCCATCACCGCCAACCCTTCCTCCCCCTCCGCCTCCGCCGCTGCCTCCTCAT	NC_028458.1	9	41081879	T/C	C	0.43	4.99e-07	NA	NA	0.001	1.245	Minor allele has positive effect
Note:	CP=Crude protein (% opf DM), ADF= Acid Detergent Fibre ( % of DM), TDN= total digestible nutrients ( % of DM)
*R2 =R2.with SNP - R2 without SNP

[truncated: 1 more sheets: Supp.Table S11]
